# Supplementary material for: A versatile approach to multiple gene RNA interference using microRNA-based short hairpin RNAs
Source: PubMed Central journal article supplement (PMC2194719; doi:10.1186/1471-2199-8-98), 2007-10-30
Supplement: 1471-2199-8-98-S1.pdf [file 1471-2199-8-98-S1.pdf]

## Additional file 1

Details of parent plasmids described in this study available from the ATCC. Entry vectors for cloning of miR-shRNA driven by different promoters and destination vectors for expression of miR-shRNA from lentivirus, retrovirus or mammalian plasmids are shown. Both AfCS barcodes and ATCC IDs are shown for locating plasmid information online. All the plasmids below are included in plate MBA-330.

AfCS plasmid db: <http://www.signaling-gateway.org/data/plasmid/>;

ATCC clone search: <http://www.atcc.org/common/catalog/molecular/index.cfm>.

| <b>Construct name</b> | <b>Vector details</b>                                                                             | <b>AfCS barcode</b> | <b>ATCC id</b> |
|-----------------------|---------------------------------------------------------------------------------------------------|---------------------|----------------|
| pEN_CmiRc2            | Entry vector; shRNA cloning/validation; CMV promoter                                              | C12ECMIRC2AG        | MBA-284        |
| pEN_cA4miRc           | Entry vector; shRNA cloning/validation; Chicken beta actin promoter                               | P20ECA4MIRAG        | MBA-285        |
| pEN_EmiRc3            | Entry vector; shRNA cloning/validation; EF1-alpha promoter                                        | P34EEFMIR3AG        | MBA-286        |
| pEN_LmiRc3            | Entry vector; shRNA cloning/validation; MSCV LTR promoter                                         | P35ELTMIR3AG        | MBA-287        |
| pEN_UBmiRc3           | Entry vector; shRNA cloning/validation; Ubi-c promoter                                            | P36EUBMIR3AG        | MBA-288        |
| pDSL_hpIC             | Lentiviral Expression; Promoterless; Gateway cassette u/s of IRES-CD4                             | L67DDLHPICXA        | MBA-289        |
| pDSL_hpIG             | Lentiviral Expression; Promoterless; Gateway cassette u/s of IRES-GFP                             | L68DDLHPIGXA        | MBA-290        |
| pDSL_hpIH             | Lentiviral Expression; Promoterless; Gateway cassette u/s of IRES-Hygromycin                      | L73DDLHPIHXA        | MBA-291        |
| pDSL_hpIN             | Lentiviral Expression; Promoterless; Gateway cassette u/s of IRES-Neo                             | L66DDLHPINXA        | MBA-292        |
| pDSL_hpIP             | Lentiviral Expression; Promoterless; Gateway cassette u/s of IRES-Puromycin                       | L75DDLHPIPXA        | MBA-293        |
| pDSL_hpIZ             | Lentiviral Expression; Promoterless; Gateway cassette u/s of IRES-Zeocin                          | L74DDLHPIZXA        | MBA-294        |
| pDS_FBneo             | Retroviral Expression; MMLV 5'LTR promoter; Bicistronic neomycin expression                       | C31DDSFBNEXA        | MBA-295        |
| pDS-FBneo_X-CFP       | Retroviral Expression; MMLV 5'LTR promoter; C-terminal CFP; Bicistronic neomycin expression       | C22DFBNXCFNA        | MBA-296        |
| pDS-FBneo_X-mCH       | Retroviral Expression; MMLV 5'LTR promoter; C-terminal mCherry; Bicistronic neomycin expression   | C30DFBNXCHNA        | MBA-297        |
| pDS-FBneo_X-YFP       | Retroviral Expression; MMLV 5'LTR promoter; C-terminal YFP; Bicistronic neomycin expression       | C23DFBNXYFNA        | MBA-298        |
| pDS_FBhyg             | Retroviral Expression; MMLV 5'LTR promoter; Bicistronic hygromycin expression                     | C33DDSFNBHYXA       | MBA-299        |
| pDS-FBhyg_X-CFP       | Retrovira Expression; MMLV 5'LTR promoter; C-terminal CFP; Bicistronic hygromycin expression      | C18DFBHXCFNA        | MBA-300        |
| pDS-FBhyg_X-mCH       | Retroviral Expression; MMLV 5'LTR promoter; C-terminal mCherry; Bicistronic hygromycin expression | C28DFBHXCHNA        | MBA-301        |
| pDS-FBhyg_X-YFP       | Retroviral Expression; MMLV 5'LTR promoter; C-terminal YFP; Bicistronic hygromycin expression     | C19DFBHXFYFNA       | MBA-302        |
| pDS_XB-GFP            | Mammalian Expression; CMV promoter; C-terminal GFP                                                | A25DCXBGFPNK        | 10326345       |
| pDS_XB-CFP            | Mammalian Expression; CMV promoter; C-terminal CFP                                                | A02DCXBCFPNK        | 10326346       |
| pDS_XB-YFP            | Mammalian Expression; CMV promoter; C-terminal YFP                                                | A01DCXBYPFNK        | 10326347       |
| pDS_X-mCherry         | Mammalian Expression; CMV promoter; C-terminal mCherry                                            | C25DCXMCHYNA        | MBA-303        |
| pDS_EF1-XB-GFP        | Mammalian Expression; EF1 promoter; C-terminal GFP                                                | A27DFXBGFPNK        | 10326349       |
| pDS_EF1-XB-CFP        | Mammalian Expression; EF1 promoter; C-terminal CFP                                                | A06DFXBCFPNK        | 10326353       |
| pDS_EF1-XB-YFP        | Mammalian Expression; EF1 promoter; C-terminal YFP                                                | A05DFXBYPFNK        | 10326350       |
