# Supplementary material for: A versatile approach to multiple gene RNA interference using microRNA-based short hairpin RNAs
Source: PubMed Central journal article supplement (PMC2194719; doi:10.1186/1471-2199-8-98), 2007-10-30

## Additional file 2

Effect of multiple miR-shRNA cassettes on lentiviral titer. **a:** Schematic of the lentiviral vector used to assess effect of multiple miR-shRNA cassettes on lentiviral titer. **b:** Relative viral titer of lentiviruses co-expressing up to three miR-shRNA cassettes. Average titer of unconcentrated control virus was  $1 \times 10^7$  pfu/ml.

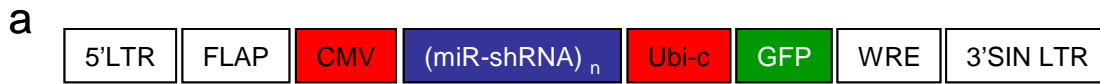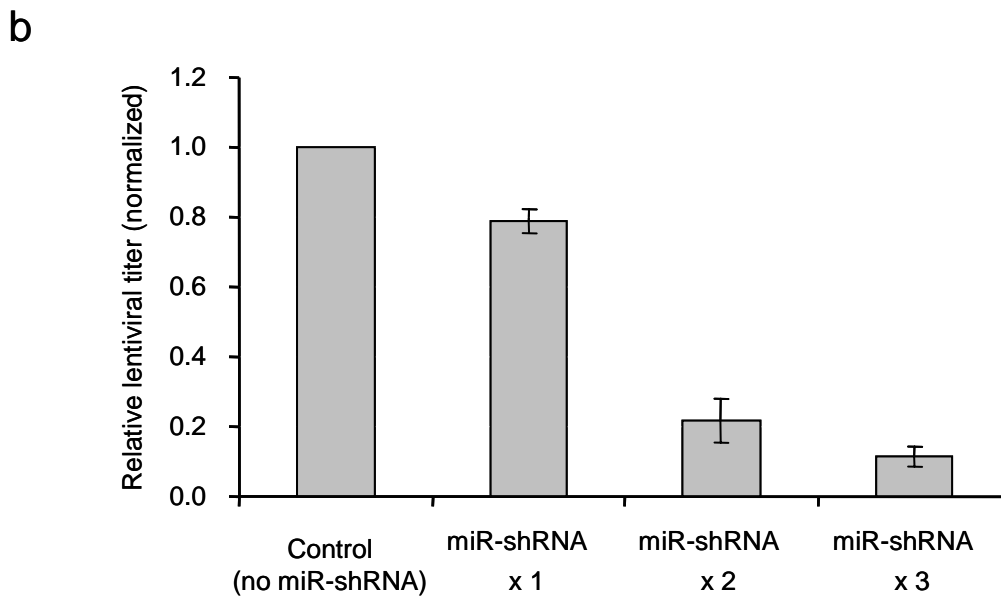

Supplement: 1471-2199-8-98-S2.pdf [file 1471-2199-8-98-S2.pdf]
